# Supplementary material for: Assessing fragility of a reinforced concrete element to snowavalanches using a non-linear mass-spring model
Source: Copernicus journal article supplement (doi:10.5194/nhess-2017-347), 2017-11-01
Supplement: Supplementary file [file nhess-2017-347-AC2-supplement.pdf]

**Review: Assessing fragility of a reinforced concrete element to snow avalanches using a non-linear mass-spring model**  
(by P. Favier, D. Bertrand, N. Eckert, I. Ousset, and M. Naaim)

First, the authors would like to thank the referees to give their time to read and react on our paper proposal. It is always a pleasure to exchange scientific ideas and other points of views. Below is a detailed response to all the comments and question raised.

**REFEREE #2**

---

The article is quite long and some of the formulations are state of the art – authors should check if they can work with referencing style by not losing the clarity.

We thank the referee for his feedback. We agree that the paper is long and we canned it once again to keep only the necessary material (especially section 4.3 that mostly remembers state of the art reliability methods). Let us just stress that the paper should stay a standalone piece of work readable by the typical NHESS readership, e.g. people not necessarily aware of the numerical and mechanical tools we are using. This is why a quick description remains for us mandatory.
